# Supplementary material for: Ablating the aryl hydrocarbon receptor (AhR) in CD11c+ cells perturbs intestinal epithelium development and intestinal immunity
Source: PubMed Central journal article supplement (PMC4828637; doi:10.1038/srep23820), 2016-04-12
Supplement: srep23820-s1.pdf [file srep23820-s1.pdf]

## SUPPLEMENTARY INFORMATION

**Title:** Ablating the aryl hydrocarbon receptor (AhR) in CD11c+ cells perturbs intestinal epithelium development and intestinal immunity.

**Authors' list:** Song Hui Chng, Parag Kundu, Carmen Dominguez-Brauer, Teo Wei Ling, Kaname Kawajiri, Yoshiaki Fujii-Kuriyama, Tak Wah Mak, Sven Pettersson

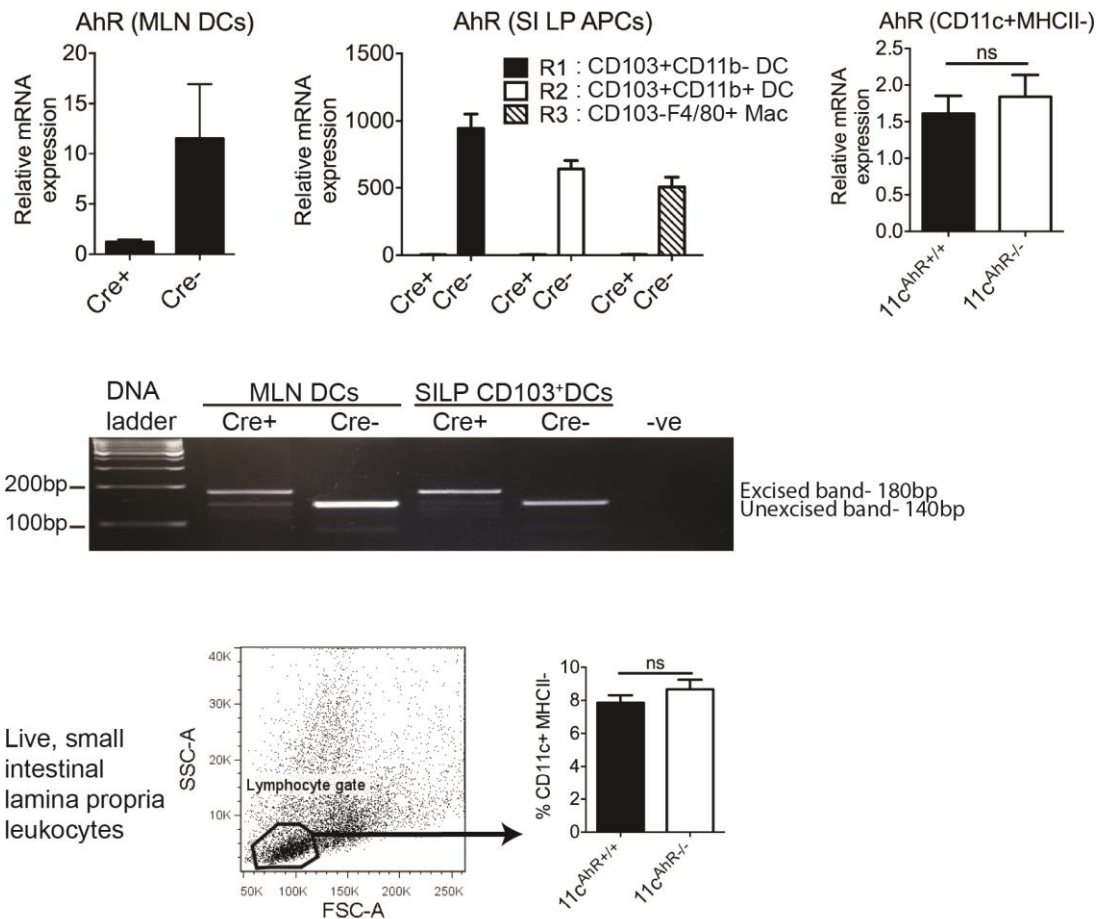

**Supplementary Figure S1. Specificity and efficacy of Cre-mediated AhR deletion in 11c<sup>AhR-/-</sup> mice.** Relative *Ahr* expression by quantitative RT-PCR assays on MLN DCs (n=6), small intestinal LP APCs (n=6-10) and CD11c+MHCII- cells (n=4) within the lymphocyte gate harvested from 11c<sup>AhR+/+</sup> (Cre-) or 11c<sup>AhR-/-</sup> (Cre+) littermates as shown. Values are mean ± SEM, Mann-Whitney test: ns, not significant. FACS sorted populations from respective groups as indicated where presence or absence of floxed *Ahr* exon 2 were probed by PCR and products separated by gel electrophoresis (n=2). FACS plot showing gating strategy for lymphocytes and subsequent quantification of CD11c+MHCII- cells, where values show mean ± SEM (n ≥12). Student's t-test: ns, not significant. Mac, Macrophages.

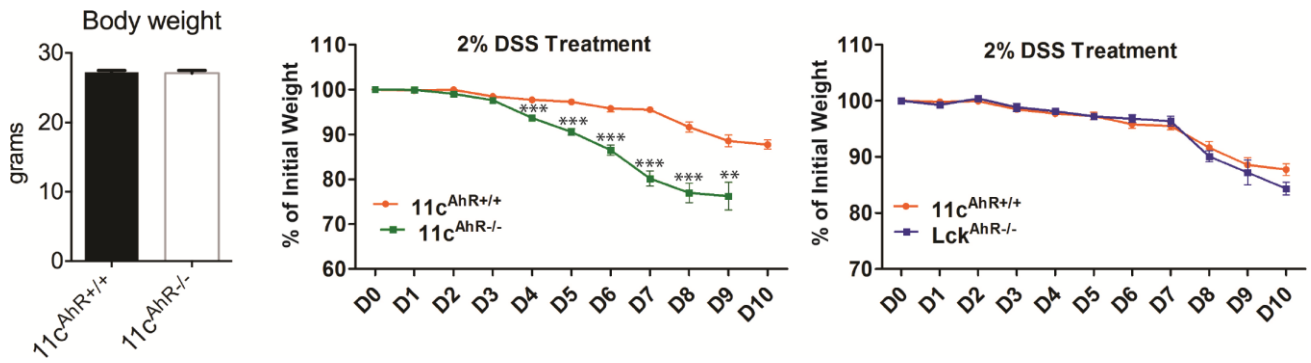

**Supplementary Figure S2. 2% DSS induced colitis in mice.** Body weight of males measured in grams at 10 weeks of age. Values are mean  $\pm$  SEM for respective groups (n =6). Graphs depicting daily percentage of initial weight of 11c<sup>AhR-/-</sup> and Lck<sup>AhR-/-</sup> mice against the control group 11c<sup>AhR+/+</sup> with all statistical differences as shown where applicable (n  $\geq$  8 per group), Student's t-test: \*\*, P < 0.01; \*\*\*, P < 0.001.

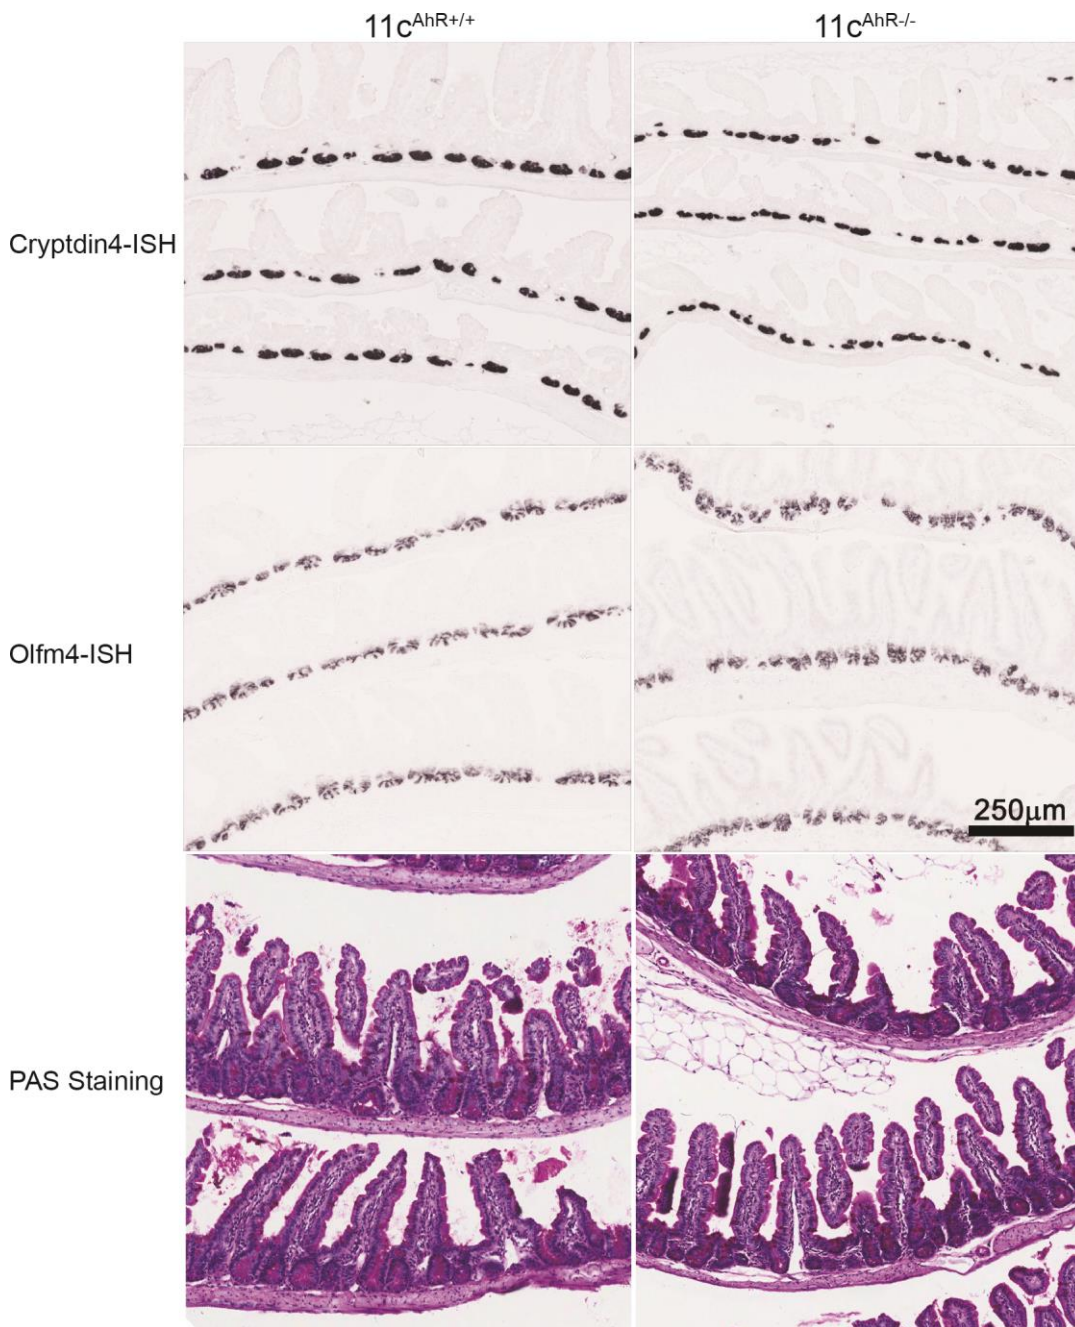

**Supplementary Figure S3. Extended tracts of small intestinal sections comparing  $11c^{AhR+/+}$  mice with littermate controls.** Representative ileal sections of respective groups as shown for *in situ* hybridizations performed to detect Paneth cells (top panel), Stem Cells (middle panel) and carbohydrate-rich cells such as Goblet cells in the villus (bottom panel) via PAS staining.

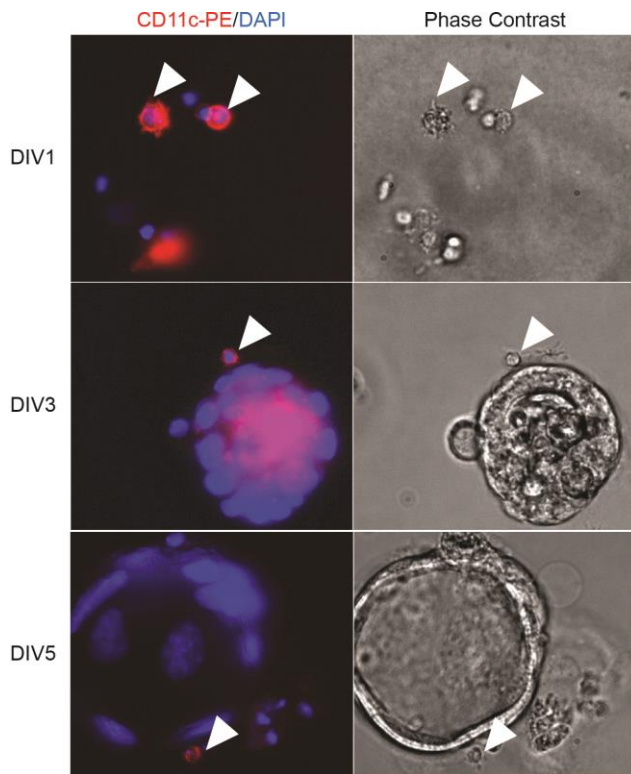

#### Epithelial lineage markers

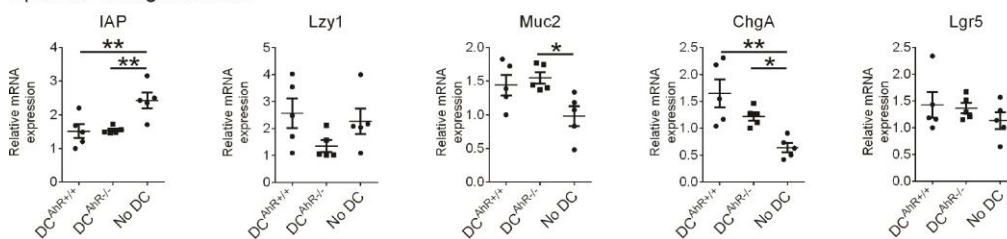

#### Transcription factors

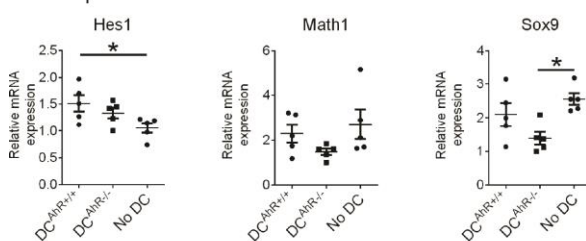

#### Cell cycle regulators

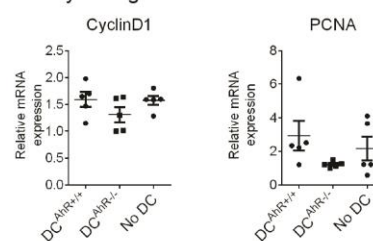

5 DCs : 1 Crypt

**Supplementary Figure S4. Co-culture experiments reveal DC- and AhR- dependent effects on *ex vivo* organoid growth and differentiation.** Immunofluorescence images of dendritic cells (red and arrows) embedded in Matrigel with co-cultured organoids on days *in vitro* (DIV) 1, 3 and 5, counterstained with DAPI to show nuclei. RT-PCR assays were performed on DIV5 samples and each data point represents a single biological replicate and presented as mean  $\pm$  SEM. One-way ANOVA with Dunnett multiple comparisons tests: \*,  $P < 0.05$ ; \*\*,  $P < 0.01$  where 'No DC' group serves as the control for mean comparisons were performed as shown. Mann-Whitney tests for mean comparisons between DC<sup>AhR+/+</sup> and DC<sup>AhR-/-</sup> groups were not statistically significant except for PCNA ( $P < 0.05$ ).

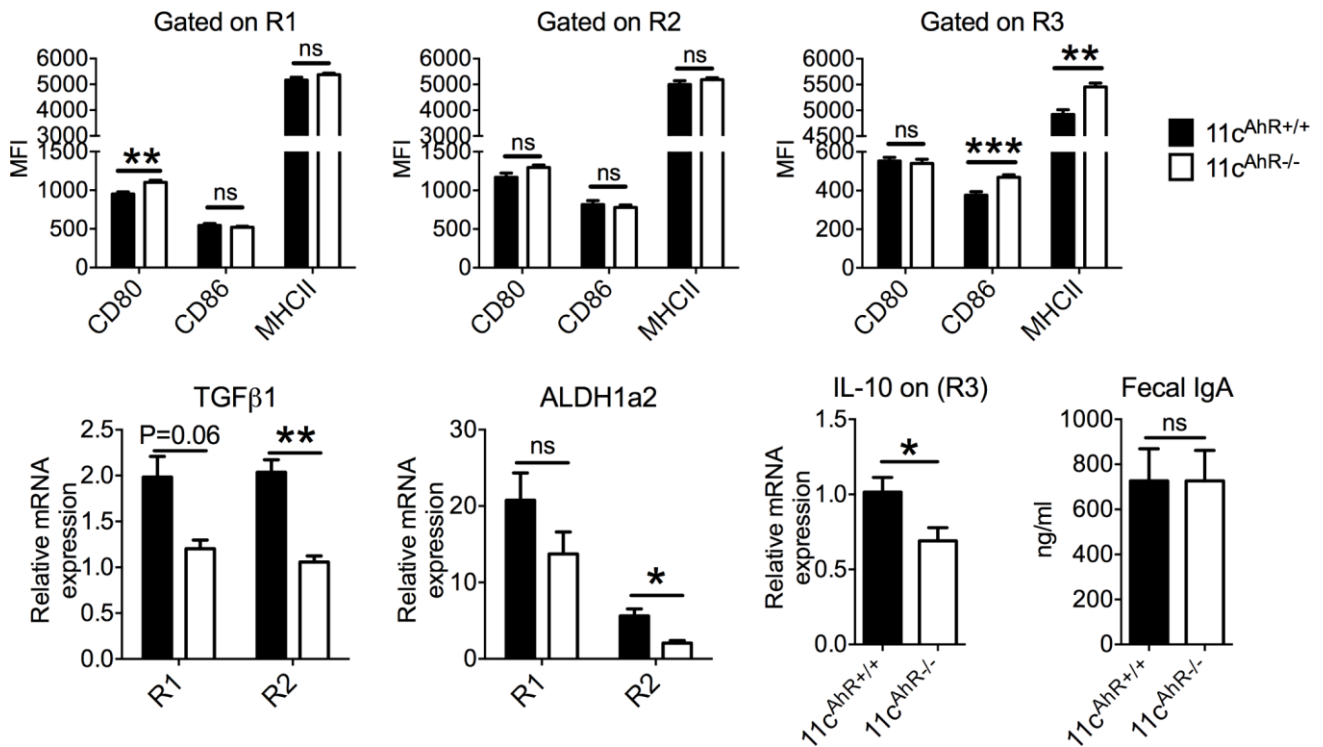

**Supplementary Figure S5. AhR-deficient APCs display a more activated, immunogenic phenotype.** Maturation markers expression levels shown as MFI  $\pm$  SEM pooled from 3-5 independent experiments from respective gated APC subsets as shown (n =5-13), Mann-Whitney test; \*\*, P < 0.01; \*\*\*, P < 0.001. Quantitative RT-PCR assays on *Tgfβ1*, *Aldh1a2* and *Ii10* expression in FACS sorted APC subsets accordingly. Bar graphs represent mean  $\pm$  SEM from 2 independent experiments (n =4-5), Mann-Whitney test: \*, P < 0.05; \*\*, P < 0.01. Mean fecal-IgA concentration  $\pm$  SEM as detected by ELISA is shown. Data presented is representative of two independent experiments (n  $\geq$ 10), Student's t-test: ns, not significant

| <b>Fluidigm 48.48 array</b>      |                |                           |                           |
|----------------------------------|----------------|---------------------------|---------------------------|
| Category (n)                     | Gene names:    | Forward Primer 5'-3'      | Reverse Primer 5'-3'      |
| Wnt receptors and mediators (13) | Fzd3           | TGTCCGTACCAGGTTACTCAGATGA | GAATCCCAACTATGAGAGCCATGA  |
|                                  | Fzd6           | TGGACACTTTTGGCATCCGA      | TATAGCCTTGGTCCCCGGAA      |
|                                  | Fzd9           | TAAGGACTTCGCGCTGGTTT      | AAGATAATCGGGCGCTCTGG      |
|                                  | Fzd10          | GCATGGCCAGCTCTTTATGG      | GTTGGCTTCAATGGCCTCAT      |
|                                  | Wnt3           | CAAGCACAAACATGAAGCAGGC    | TCGGGACTCACGGTGTCTCTC     |
|                                  | Wnt3a          | TCGGAGATGGTGGTAGAGAAA     | CGCAGAAGTTGGGTGAGG        |
|                                  | Wnt2b          | CACCCGGACTGATCTTGTCT      | GCCACAACACATGATTTTACA     |
|                                  | Wnt5b          | GACGCCAACTCCTGGTGGT       | GCATAACTCTGCCAAAGACAGATG  |
|                                  | Wnt7a          | CGACTGTGGCTGCGACAAG       | CTTCATGTTCTCCTCCAGGATCTTC |
|                                  | Wnt8b          | TTGGGACCGTTGGAATTGCC      | AGTCATCACAGCCACAGTTGTC    |
|                                  | Wnt9a          | GCAGCAAGTTTGTCAAGGAGTTCC  | GCAGGAGCCAGACACACCATG     |
|                                  | Wnt11          | CGTGTGCTATGGCATCAAGT      | GCTCGATGGAGGAGCAGTTC      |
|                                  | Dkk3           | CGAGAGGTGGAGGAGCTGATG     | GTCTCCGTGCTGGTCTCATTG     |
| Wnt Targets (6)                  | Axin2          | GAGCAGCTCAGCAAAAAGGG      | ACTGTCTCGTCGTCCCAGAT      |
|                                  | BMP4           | CTTGAGTACCCGGAGCGTC       | AAAGCAGAGCTCTCACTGGTC     |
|                                  | Sox9           | AGGAAGCTGGCAGACCAGTA      | TCCACGAAGGGTCTCTTCTC      |
|                                  | C-myc          | CAGCCCTGAGCCCCTAGT        | TCTCCACAGACACCACATCAA     |
|                                  | Wisp1          | TGATGACGCAAGGAGACCAC      | CCGGGCATTGACGTTAGAGA      |
|                                  | Wisp2          | GTTTTGTGCCGCTGTGATG       | CTGAGGAGGGCTGGATTG        |
| Cytokines (8)                    | TNF $\alpha$   | CAAATGGCCTCCCTCTCAT       | CTCCTCCACTTGGTGGTTTG      |
|                                  | IL-1 $\beta$   | GCTGAAAGCTCTCCACCTCA      | GGCCACAGGTATTTTGTCTG      |
|                                  | IL-6           | CAAAGCCAGAGTCCTTCAGA      | GAGCATTGGAAATTGGGGTA      |
|                                  | IL-12A         | GTGTCAATCACGCTACCTCC      | TTTCTCTGGCCGTCTTCACC      |
|                                  | IL-23A         | GCACCTGCTTGA CTCTGACA     | ATCCTCTGGCTGGAGGAGTT      |
|                                  | TGF- $\beta$ 1 | GTGTGGAGCAACATGTGGAA      | CGTCAAAGACAGCCACTCA       |
|                                  | IL-10          | ATCGATTTCTCCCCTGTGAA      | TCATTCATGGCCTTGTAGACAC    |
|                                  | IFN $\gamma$   | ATGAACGCTACACACTGCATC     | CCATCCTTTTGCCAGTTCCTC     |
| Enzymes and TFs (4)              | ALDH1a2        | ACCGTGTTCTCCAACGTCACTGAT  | TGCATTGCGGAGGATACCATGAGA  |
|                                  | Blimp1         | GACGGGGGTACTTCTGTTCA      | GGCATTCTTGGGA ACTGTGT     |
|                                  | IDO1           | CCATGGCGTATGTGTGGAAC      | AGAGCTCGCAGTAGGGAACA      |
|                                  | IRF4           | AATCCCCATTGAGCCAAGCA      | TCGTCGTGGTCAGCTCTTTC      |
| Notch Signalling (7)             | Notch1         | CGGTGAACAATGTGGATGCT      | ACTTTGGCAGTCTCATAGCT      |
|                                  | Notch2         | GTGGAGGCGACTCTTCTGCT      | GCTGGGAGTCACGTTATACT      |
|                                  | Jagged1        | GCCGAGGTCTTACTTTGCT       | GTGGGCAATCCCTGTGTTTT      |
|                                  | Jagged2        | GAGGTCAAGGTGGAACAGT       | TGTCCACCATACGCAGATAA      |

|                               |                |                          |                          |
|-------------------------------|----------------|--------------------------|--------------------------|
|                               | Hes1           | TCAGCGAGTGCATGAACGAG     | CATGGCGTTGATCTGGGTCA     |
|                               | Hey1           | TGAGCTGAGAAGGCTGGTAC     | ACCCCAAACCTCCGATAGTCC    |
|                               | Dll4           | GCACCAAACCTCCTTCGTCGTC   | GTTTCCTGGCGAAGTCTCTG     |
|                               |                |                          |                          |
| AhR pathway (4)               | AhR            | AGCCGGTGCAGAAAACAGTAA    | AGGCGGTCTAACTCTGTGTTT    |
|                               | Cyp1a1         | CAGGATGTGTCTGGTTACTTTGAC | CTGGGCTACACAAGACTCTGTCTC |
|                               | Cyp1a2         | CCATGTGCTTTGGGAAGAACTT   | GTCCTTGCTGTTATTCACGATGTT |
|                               | Cyp1b1         | CCGAAAAGAAAGCGTCTGG      | GAACATCCGGGTATCTGGTAAA   |
|                               |                |                          |                          |
| Housekeeping genes (6)        | Ppia           | CACCGTGTTCTTCGACATCA     | CAGTGCTCAGAGCTCGAAAGT    |
|                               | Polr2a         | TGGTCCTTCGAATCCGCATC     | GGACTCAATGCATCGCAGGA     |
|                               | Hprt           | AGCCAAATACAAAGCCTAAGATGA | GGACGCAGCAACTGACAT       |
|                               | Tbp            | GCACAGGAGCCAAGAGTG       | AGGGAACCTTCACATCACAGC    |
|                               | Hmbs           | CCACGGGAGACAAGATTC       | ACAGCATCACAAGGGTTT       |
|                               | $\beta$ -actin | CTGTATTCCCCTCCATCGTG     | CCTCGTCACCCACATAGGAG     |
|                               |                |                          |                          |
| <b>Co-culture experiments</b> |                |                          |                          |
|                               |                |                          |                          |
| Epithelial lineage markers    | Lzy1           | GAGACCGAAGCACCGACTATG    | CGGTTTTGACATTGTGTTTCG    |
|                               | ChgA           | CCCGAAGTGACTTTGAGGAA     | GATGGCTGACAGGCTCTCTA     |
|                               | Muc2           | ACAAAACCCCAAGCAACAAG     | GAGCAAGGGACTCTGGTCTG     |
|                               | IAP            | GGTATCATCCCAGCTGAAGAG    | CATCCCGTCTCCCAGGAA       |
|                               | Lgr5           | CCCAATGCGTTTTCTACGTT     | AGGCTCGGTTCCCTGTTAAT     |
|                               |                |                          |                          |
| Transcription factor          | Math1          | TCCCGTCCTTCAACAACGAC     | CTCTCCGACATTGGGAGTCTG    |
|                               |                |                          |                          |
| Proliferation markers         | PCNA           | ACCTCACCAGCATGTCCAA      | TCTTGATTTGGTGCTTCGAATA   |
|                               | Cyclin-D1      | AGTGCGTGCAGAAGGAGATT     | AGGAAGCGGTCCAGGTAGTT     |
|                               |                |                          |                          |

Supplementary Table 1
